# Supplementary material for: The Impact of Social Distancing Due to the COVID-19 Pandemic on People with Dementia, Family Carers and Healthcare Professionals: A Qualitative Study
Source: MDPI journal article supplement (doi:10.3390/ijerph19010519), 2022-01-04
Supplement: s1 [file s1]

**The impact of social distancing due to the COVID-19 pandemic on people with dementia, family carers and healthcare professionals: a qualitative study**

***Supplement I: Topic list interview of the ISOLATE study***

|                                                                                                                                                                                                                                                                                                                                                                                                                                      |
|--------------------------------------------------------------------------------------------------------------------------------------------------------------------------------------------------------------------------------------------------------------------------------------------------------------------------------------------------------------------------------------------------------------------------------------|
| <b>Demographic data</b>                                                                                                                                                                                                                                                                                                                                                                                                              |
| 1. Do you provide care in the residential setting or home care or are you a family carer?                                                                                                                                                                                                                                                                                                                                            |
| 2. How old are you?                                                                                                                                                                                                                                                                                                                                                                                                                  |
| 3. What is your gender?                                                                                                                                                                                                                                                                                                                                                                                                              |
| 4. What is your ethnicity?                                                                                                                                                                                                                                                                                                                                                                                                           |
| 5. What is your highest level of education?                                                                                                                                                                                                                                                                                                                                                                                          |
| 6. How many years of experience do you have as a care provider?                                                                                                                                                                                                                                                                                                                                                                      |
| 7. What is your relationship to the person with dementia that you care for as an informal carer?<br><i>Continue with questions about the person with dementia (such as severity and type of dementia, when did it start developing, etc.)</i>                                                                                                                                                                                        |
| 8. On average, how many hours a week did you spend on caring for [people with dementia / your relative] during the COVID-19 pandemic?<br><i>If family carer: Since when have you been their carer?</i>                                                                                                                                                                                                                               |
| 9. Is that more or less than you were used to in comparison with the period before the COVID-19 pandemic? What was the reason for this difference, if any?                                                                                                                                                                                                                                                                           |
| <b>Semi-structured interview</b>                                                                                                                                                                                                                                                                                                                                                                                                     |
| <b>How did you experience caring for your relative/people with dementia before the pandemic?</b><br>(a) first address how the person(s) with dementia experience(s) the pandemic<br>(b) how does the interviewee experience the pandemic as it relates to the care for the person(s) with dementia<br><br><i>Orientation to gain a picture of how the participant views the care without the influence of the COVID-19 pandemic.</i> |
| <b>How did you experience the COVID-19 pandemic?</b><br><br><i>Ask specifically about both the positive and the negative aspects of the pandemic for both the interviewee and the person(s) with dementia they care for.</i>                                                                                                                                                                                                         |
| <b>In your opinion, what was the impact of social distancing during the COVID-19 pandemic on (the behaviour of) [people with dementia / your relative]?</b>                                                                                                                                                                                                                                                                          |

*Specifically ask about the influence of social distancing on:*

- *Health care*
- *Well-being (physical, psychological, and social)*
- *Social contacts*

*and the relationship between these three themes*

*Remember to also ask about the different periods (total closure, restrictions)*

*How did the behaviour develop over time?*

**What are your biggest concerns regarding social distancing and people with dementia?**

*Ask specifically about concerns regarding:*

- *Care*
- *Well-being (physical, psychological, and social)*
- *Social contacts*

**What do you think is needed in the future to reduce your concerns regarding social distancing and people with dementia?**

*Try to refer back to the positive experiences mentioned earlier.*

*And specifically ask about concerns regarding:*

- *Care*
- *Well-being (physical, psychological, and social)*
- *Loneliness*

**What is your opinion on the current healthcare policy for people with dementia during the COVID-19 pandemic? Focus on "What would you do?"**

*Ask specifically about concerns regarding:*

- *Care*
- *Well-being (physical, psychological, and social)*
- *Social contact (and loneliness)*

**What do you think needs to be improved about the healthcare policy to safeguard the care and well-being of people with dementia during any future pandemic?**

*Ask specifically about policies related to:*

- *Care*
- *Well-being (physical, psychological, and social)*

- *Loneliness*

*If relevant, ask about policies for supporting family carers and healthcare professionals.*

**What are your greatest concerns regarding social distancing and your own situation?**

*Ask specifically about concerns regarding:*

- *Care*
- *Well-being (physical, psychological, and social)*
- *Social contacts (also ask about the loneliness of people involved)*

**What do you think is needed in the future to reduce your concerns regarding social distancing and your own situation?**

*Try to refer back to the positive experiences mentioned earlier.*

*Ask specifically about concerns regarding:*

- *Care*
- *Well-being (physical, psychological, and social)*
- *Loneliness*
